# Supplementary material
Source: PubMed Central journal article supplement (PMC6082141)
Supplement: NIHMS935751-supplement-1.pdf [file NIHMS935751-supplement-1.pdf]

**A**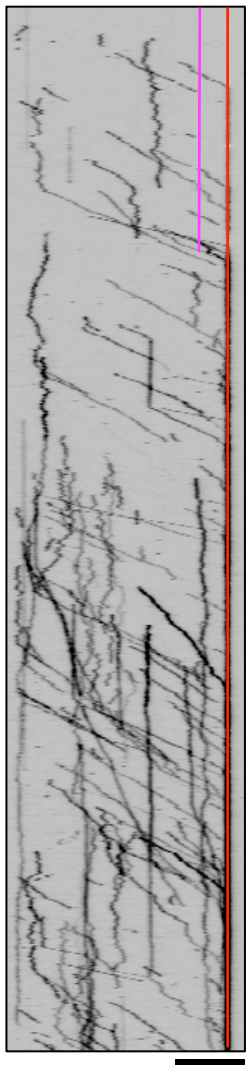**B**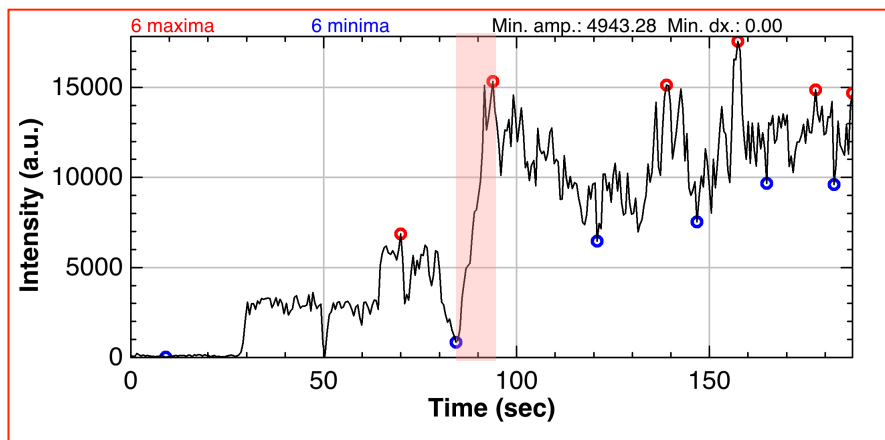**C**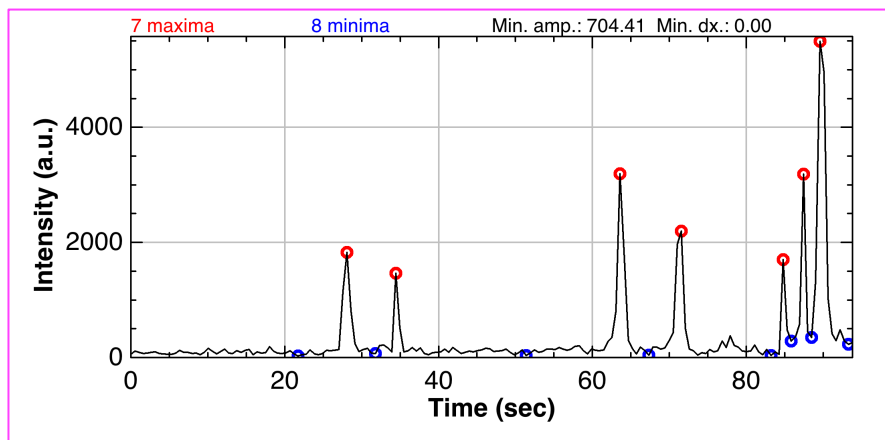**D**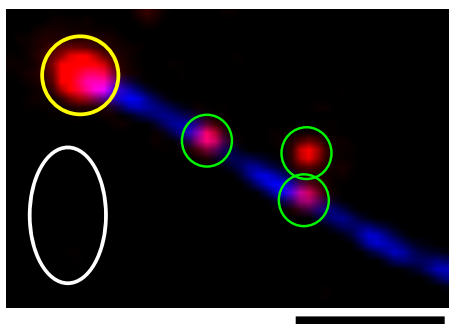**E**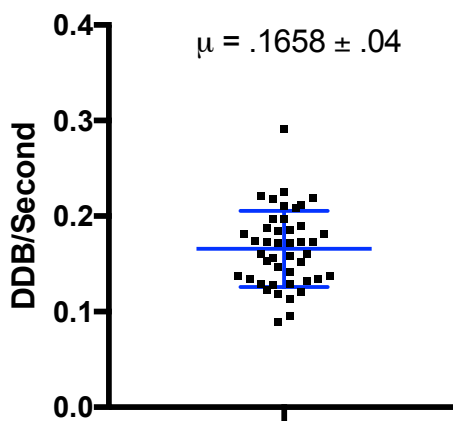

**Figure S1: Determination of Numbers of DDB Molecules at MT Minus-Ends, related to Figure 1. (A)** A kymograph of a microtubule accumulating DDB at its minus-end (reproduced from Figure 1B). A line scan was drawn along the region corresponding to the MT minus-end (red). The earliest peak of the fluorescence intensity plateau along this line scan was used as a fiducial for when the minus-end accumulation reaches saturation. A second line scan (pink) extending as far as the DDB intensity plateau fiducial in the Y-axis was drawn further into the MT as close to the minus-end as possible without interference from the growing minus-end accumulation. **(B)** Intensity plot of the microtubule minus-end (red line in kymograph **(A)**). The earliest peak of the fluorescence intensity plateau as indicated by the red highlight was used as a fiducial for when a minus-end reaches saturation. **(C)** Intensity plot in the microtubule lattice used to count the number of DDB that enter the minus-end accumulation until saturation. Every peak intensity on this new line scan corresponds to a single DDB crossing the point in space. Red circles indicate peaks and correspond to individual DDB. **(D)** Example of intensity analysis for numbers of DDB at MT ends. Yellow, white, and green circles indicate ROIs for minus-end accumulations, background fluorescence normalization, and single molecules, respectively. Scale bar: 2  $\mu\text{m}$ . **(E)** Plot of the rate at which DDB enter the minus-end.  $\mu = .1658 \pm .04$ . N = 44.

A WT MT/CPA MT/p150

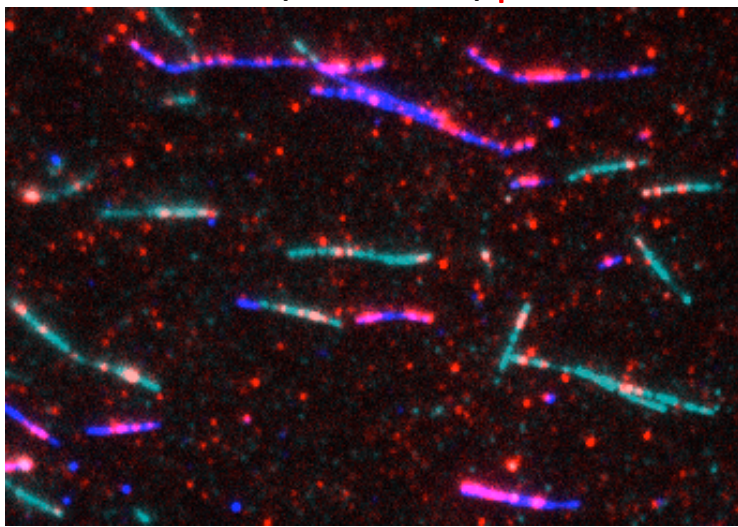

B

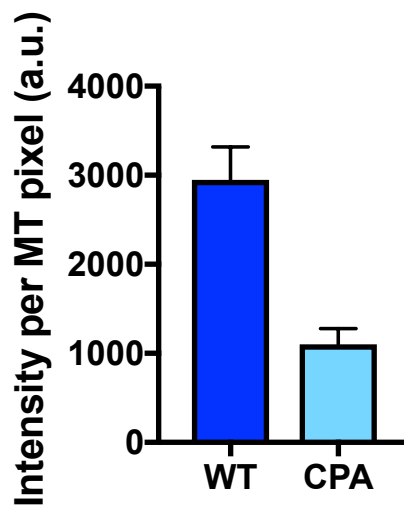

C

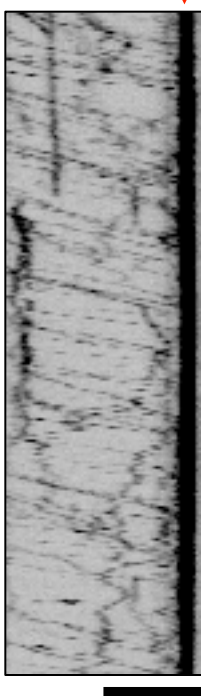

D

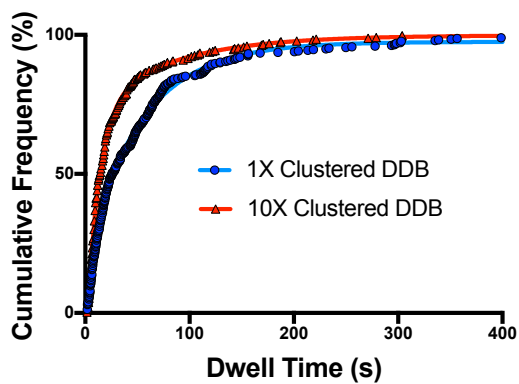

E

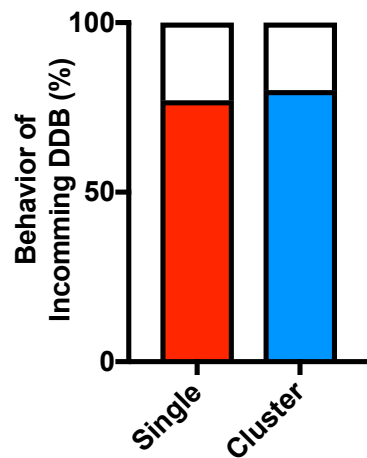

F

|                   | $\tau_1$ (s)          | $\tau_2$ (s)          | $\% \tau_1$           | $\% \tau_2$           | N   |
|-------------------|-----------------------|-----------------------|-----------------------|-----------------------|-----|
| 1X Clustered DDB  | 8.4<br>(7.5 - 9.4)    | 54.1<br>(52.2 - 56.2) | 28.8<br>(27 - 30.7)   | 71.2<br>(69.3 - 73)   | 397 |
| 10X Clustered DDB | 11.8<br>(11.2 - 12.5) | 78.5<br>(49.9 - 96.5) | 76.3<br>(73.7 - 78.5) | 23.7<br>(21.5 - 26.3) | 320 |

**Figure S2: The p150-MT Interaction is Not Required for Cooperative Accumulation of DDB at Minus-ends, related to Figure 2.** **(A)** Representative image of TMR-labeled p150-SNAP (red) binding affinity for WT MTs (blue) compared to carboxypeptidase A (CPA)-treated MT (cyan). Scale bars: 5  $\mu\text{m}$ , 30 sec. **(B)** Quantification of integrated p150 intensity on either WT or CPA-treated MT. Data represented as intensity minus background per pixel of p150 signal along a microtubule. Average WT and CPA-treated intensity are 2950 a.u.  $\pm$  370 and 1100 a.u.  $\pm$  176, respectively.  $P = .0001$  by Student's T-test. Error bars represent SEM.  $N = 90$  and 64 MTs, from two independent experiments. **(C)** Kymograph showing that DDB accumulation at a MT minus-end (red arrow) is constant in size even at much higher flux of incoming DDB molecules. Scale bars: 5  $\mu\text{m}$ , 30 sec. **(D)** Plot of cumulative frequency comparing single DDB dwell times within minus-end DDB clusters at 1X and 10X DDB concentration. Note 1X DDB concentration data is reproduced from Figure 2E. **(E)** Table summarizing the parameters of cumulative frequency graphs comparing 1X and 10X DDB concentrations, including the characteristic dwell time ( $\tau$ ) of short ( $\tau_1$ ) and long ( $\tau_2$ ) populations, percentage of molecules in each population, and number of molecules measured ( $N$ ) are given. 95% confidence intervals given in parentheses. All regressions have a goodness of fit ( $R^2$ ) greater than .99. All data from 2-3 independent experiments. **(F)** Plot of the percent of incoming DDB molecules to the MT minus-end that either dwell (filled) or fall off immediately (empty) on bare minus-ends (red) and minus-ends with DDB clusters (blue). Percent of molecules that dwell are 77% and 83% for vacant and clustered minus ends, respectively.  $P = .2734$  by Fischer's exact test.

Figure S3

A

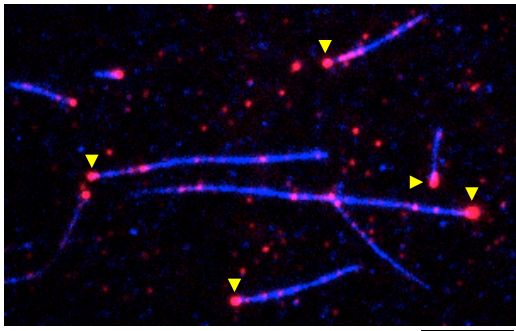

B

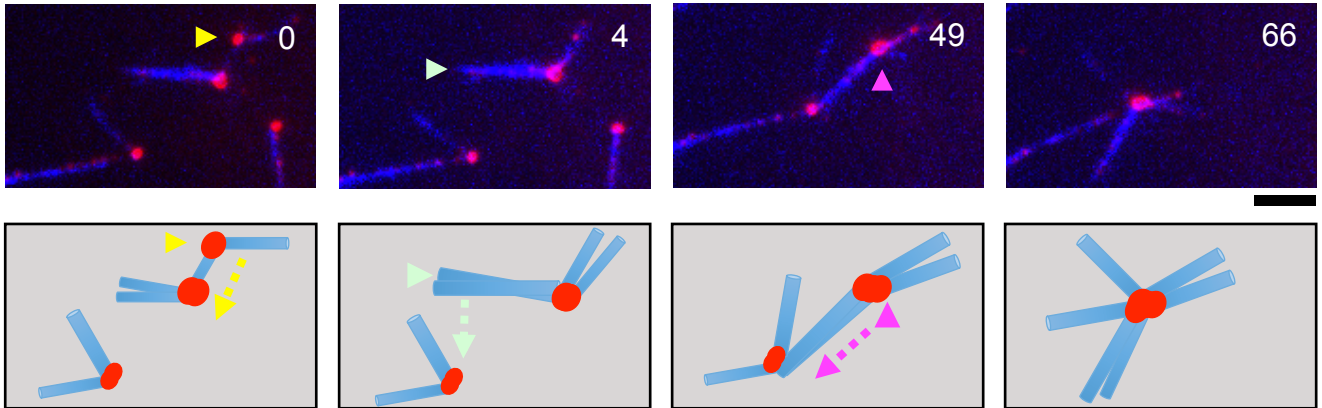

C

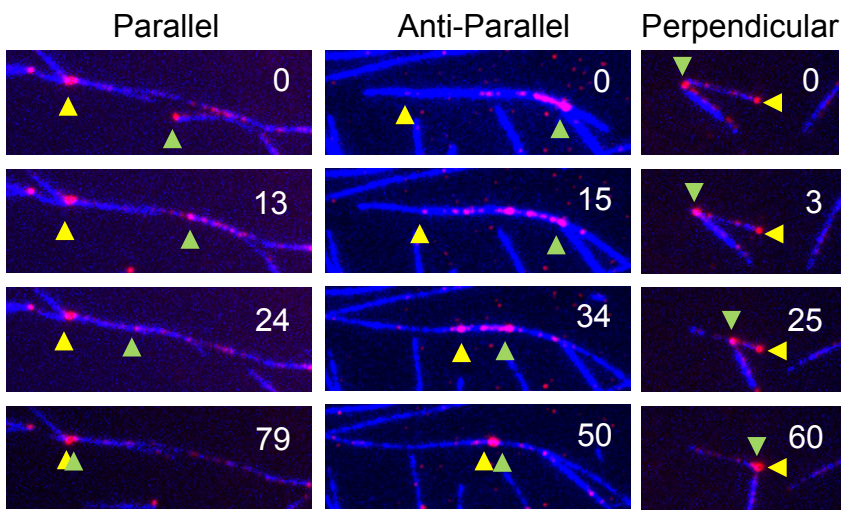

D

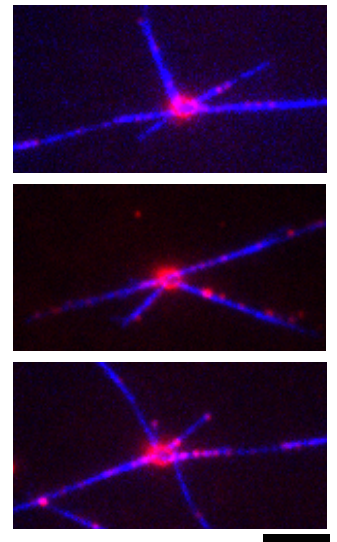

**Figure S3: Minus-End Accumulations of DDH Drive MT Reorganization Similar To DDB, related to Figure 3. (A)** TIRF-M image of DDH (red) forming clusters (yellow arrows) at MT minus-ends. Scale bar: 5  $\mu\text{m}$ . **(B)** Top: Image frames showing steps during MT reorganization into a mini-aster. Arrows highlight minus-end accumulations that drive sliding in that frame. Bottom: Schematic depicting the DDB-driven movements of MTs. Red dots indicate DDB clusters at minus-ends. Arrows highlight the direction of sliding MTs. Scale bar: 2  $\mu\text{m}$ , time is in sec. **(C)** Examples of parallel, anti-parallel, and oblique sliding driven by minus-end accumulations of DDH. Yellow and green arrows indicate minus-ends of sliding microtubules inferred from DDH accumulation. Scale bar: 5  $\mu\text{m}$ , time is in sec. **(D)** Examples of mini-asters formed through DDH-driven MT-MT sliding. Scale bars: 5  $\mu\text{m}$ .
